# Supplementary material for: In situ forming, mechanically resilient hydrogels prepared from 4a-[PEG-b-PTMC-Ac] and thiolated chondroitin sulfate for nucleus pulposus cell delivery
Source: Royal Society of Chemistry journal article supplement (doi:10.1039/d3tb02574h), 2023-12-21
Supplement: d3tb02574h1.pdf [file d3tb02574h1.pdf]

## Supplemental Information

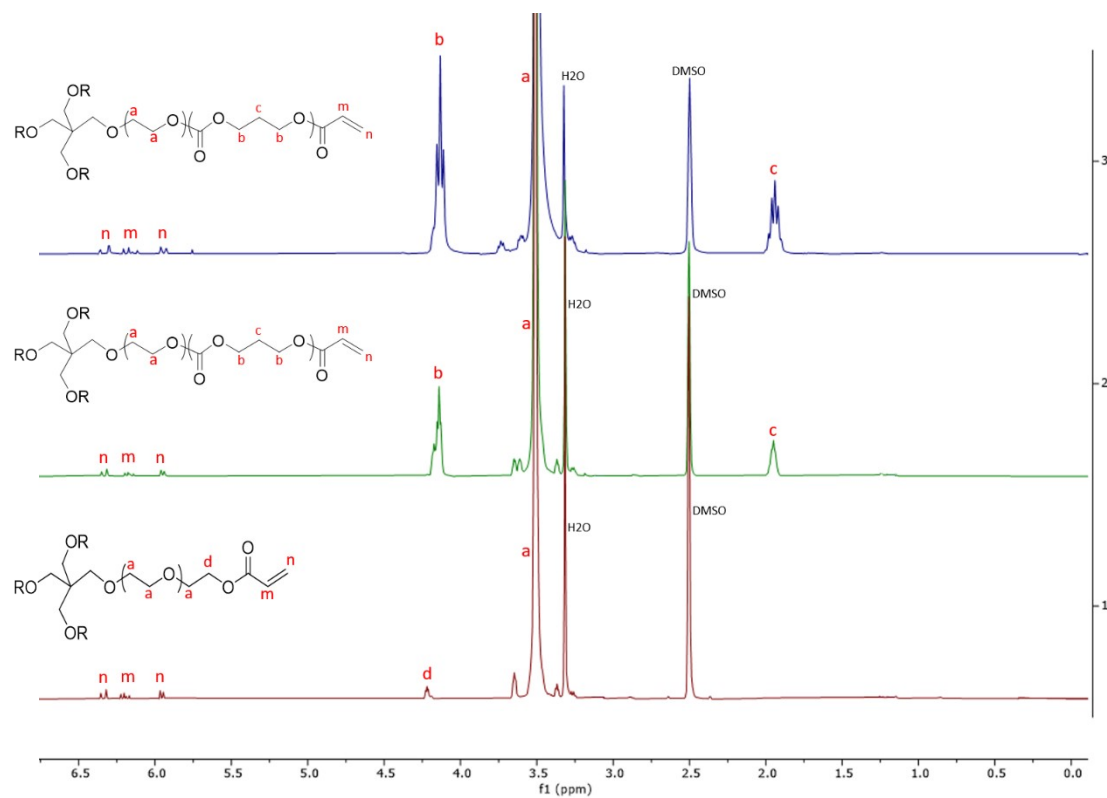

**Figure S1.** Chemical structure and  $^1\text{H}$  NMR spectra (DMSO, 400 MHz) with peak assignments of: 1) 4a-[P(EG)<sub>3.75</sub>-AC], 2) 4a-[P(EG)<sub>3.75</sub>-*b*-P(TMC)<sub>0.42</sub>-AC], and 3) 4a-[P(EG)<sub>3.75</sub>-*b*-P(TMC)<sub>0.65</sub>-AC].

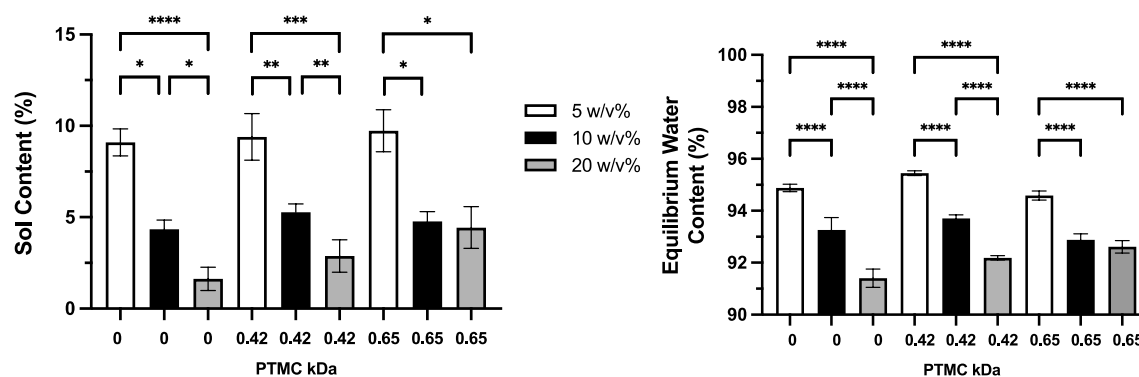

**Figure S2.** a) Sol content and b) equilibrium water content as a function of prepolymer composition and concentration in solution. (n = 5 - 6, mean ± SD). Significance differences between hydrogels are indicated as: \* 0.01 < p < 0.05, \*\* 0.001 < p < 0.01, \*\*\* 0.0001 < p < 0.001, \*\*\*\* p ≤ 0.0001.

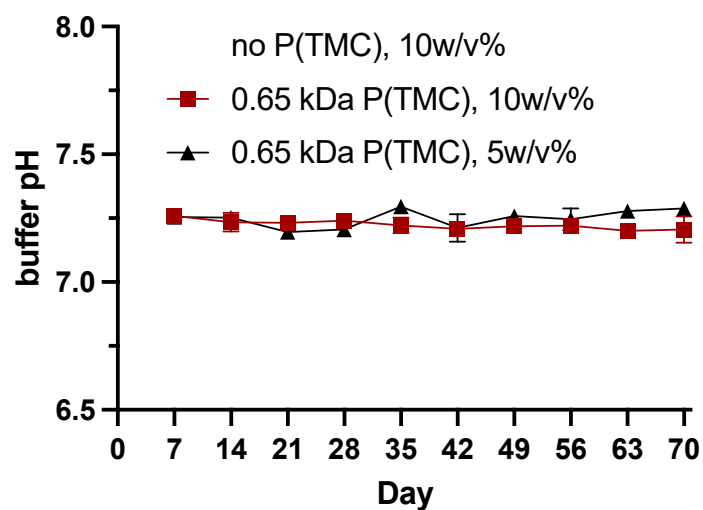

**Figure S3.** Change in buffer pH during hydrogel in vitro degradation.

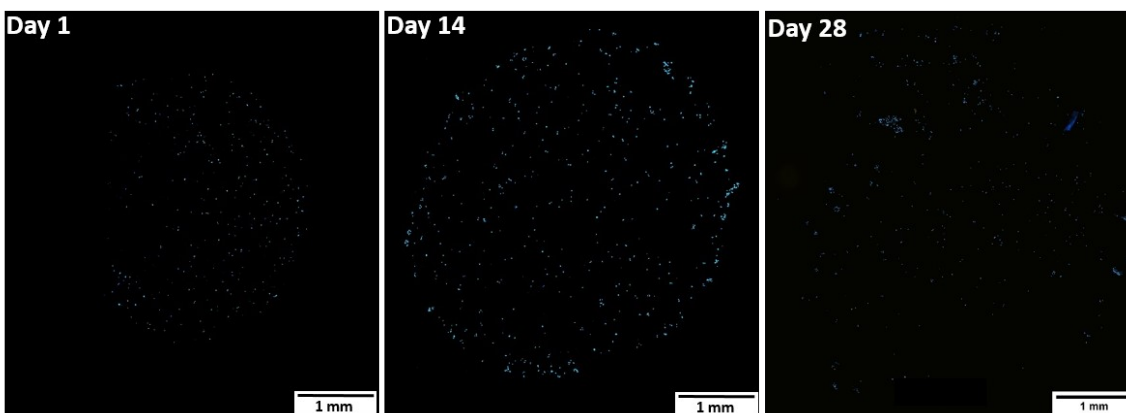

**Figure S4:** Representative images of collagen type I stained NPC-laden hydrogels at day 1, 14, and 28. Cell nuclei are stained blue. No collagen type I was observed during the culture period.
